# Supplementary material
Source: Springer Nature journal article supplement (https://www.springermedizin.de/resource/supplementary/12872_2007_184_MOESM2_ESM.pdf/9431272)

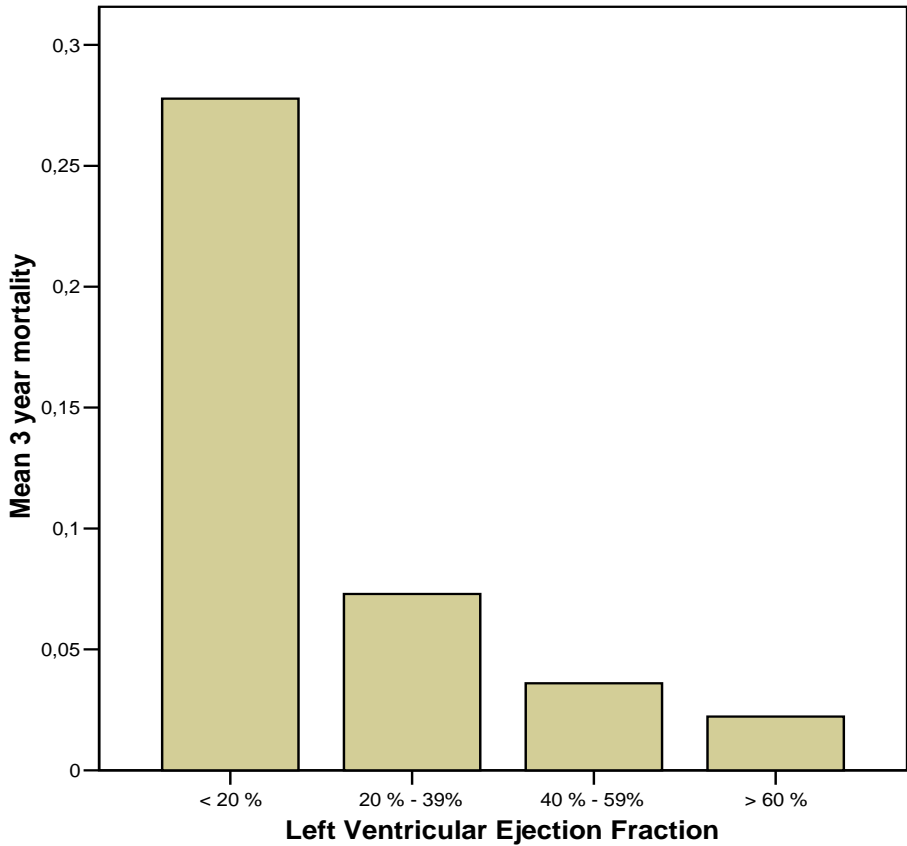

Supplement: MOESM2 [file 9431272]
